# Supplementary material for: Prevalence and Virulence of Commensal Pseudomonas Aeruginosa Isolates from Healthy Individuals in Southern Vietnam (2018–2020)
Source: MDPI journal article supplement (doi:10.3390/biomedicines11010054), 2022-12-26
Supplement: s1 [file s1]

## Supplementary materials

**Table S1.** *Pseudomonas* species were isolated from three body sites (1-throat, 2-naris, 3-outer ear). They were conforming by 16S rRNA sequencing. The bold fonts indicate *P. aeruginosa* isolates.

| No. | Positive Isolates Positive for <i>oprL</i> | 16S rRNA Sequencing         |
|-----|--------------------------------------------|-----------------------------|
| 1   | 48.2                                       | <i>P. stutzeri</i>          |
| 2   | <b>113.1</b>                               | <b><i>P. aeruginosa</i></b> |
| 3   | 138.2                                      | <i>P. stutzeri</i>          |
| 4   | 154.3                                      | <i>P. stutzeri</i>          |
| 5   | 156.2                                      | <i>P. stutzeri</i>          |
| 6   | 175.2                                      | <i>P. stutzeri</i>          |
| 7   | 176.2                                      | <i>P. stutzeri</i>          |
| 8   | 182.2                                      | <i>P. stutzeri</i>          |
| 9   | <b>185.1</b>                               | <b><i>P. aeruginosa</i></b> |
| 10  | 185.2                                      | <i>P. stutzeri</i>          |
| 11  | <b>211.3</b>                               | <b><i>P. aeruginosa</i></b> |
| 12  | 228.2                                      | <i>P. stutzeri</i>          |
| 13  | 229.3                                      | <i>P. stutzeri</i>          |
| 14  | <b>234.1</b>                               | <b><i>P. aeruginosa</i></b> |
| 15  | 256.3                                      | <i>P. azelaica</i>          |
| 16  | <b>263.1</b>                               | <b><i>P. aeruginosa</i></b> |
| 17  | <b>267.1</b>                               | <b><i>P. aeruginosa</i></b> |
| 18  | 303.1                                      | <i>P. nitroreducens</i>     |
| 19  | <b>306.3</b>                               | <b><i>P. aeruginosa</i></b> |
| 20  | <b>307.1</b>                               | <b><i>P. aeruginosa</i></b> |
| 21  | <b>307.2</b>                               | <b><i>P. aeruginosa</i></b> |
| 22  | <b>338.2</b>                               | <b><i>P. aeruginosa</i></b> |
| 23  | <b>355.1</b>                               | <b><i>P. aeruginosa</i></b> |
| 24  | 386.2                                      | <i>P. stutzeri</i>          |
| 25  | <b>388.1</b>                               | <b><i>P. aeruginosa</i></b> |
| 26  | <b>464.3</b>                               | <b><i>P. aeruginosa</i></b> |
| 27  | <b>486.1</b>                               | <b><i>P. aeruginosa</i></b> |
| 28  | <b>499.2</b>                               | <b><i>P. aeruginosa</i></b> |
| 29  | <b>507.1</b>                               | <b><i>P. aeruginosa</i></b> |
| 30  | <b>544.2</b>                               | <b><i>P. aeruginosa</i></b> |
| 31  | 565.3                                      | <i>P. stutzeri</i>          |
| 32  | <b>575.3</b>                               | <b><i>P. aeruginosa</i></b> |
| 33  | 582.1                                      | <i>P. azelaica</i>          |
| 34  | <b>588.1</b>                               | <b><i>P. aeruginosa</i></b> |
| 35  | <b>600.2</b>                               | <b><i>P. aeruginosa</i></b> |

**Table S2.** List of 19 *P. aeruginosa* carriers.

| No. | Age Range (years) | Sex | Health Status        |
|-----|-------------------|-----|----------------------|
| 113 | 18-59             | F   | Sinusitis history    |
| 185 | 18-59             | F   | No sinusitis history |
| 211 | ≥ 60              | F   | Sinusitis history    |
| 234 | 18-59             | F   | Sinusitis history    |
| 263 | 18-59             | F   | Sinusitis history    |
| 267 | 18-59             | F   | No sinusitis history |
| 306 | 18-59             | F   | Sinusitis history    |
| 307 | 18-59             | F   | Sinusitis history    |
| 338 | 18-59             | M   | Sinusitis history    |
| 355 | ≥ 60              | F   | Sinusitis history    |
| 388 | 18-59             | M   | No sinusitis history |
| 464 | 18-59             | M   | Sinusitis history    |
| 486 | 18-59             | F   | Sinusitis history    |
| 499 | 18-59             | F   | No sinusitis history |
| 507 | 18-59             | F   | Sinusitis history    |
| 544 | 18-59             | M   | Sinusitis history    |
| 575 | <18               | M   | Sinusitis history    |
| 588 | 18-59             | M   | No sinusitis history |
| 600 | 18-59             | M   | Sinusitis history    |

**Table S3.** *oprL*- positive *Pseudomonas* isolates and their colonization sites.

| Species                 | Total number<br>( <i>n</i> = 35) | Throat ( <i>n</i> = 13) | Naris ( <i>n</i> = 14) | Outer ears ( <i>n</i> = 8) |
|-------------------------|----------------------------------|-------------------------|------------------------|----------------------------|
| <i>P. aeruginosa</i>    | 20 (57.14%)                      | 11 (84.62%)             | 5 (35.71%)             | 4 (50%)                    |
| <i>P. stutzeri</i>      | 12 (34.29%)                      | 0                       | 9 (64.29%)             | 3 (37.50%)                 |
| <i>P. azelaica</i>      | 2 (5.71%)                        | 1 (7.62%)               | 0                      | 1 (12.50%)                 |
| <i>P. nitroreducens</i> | 1 (2.86%)                        | 1 (100%)                | 0                      | 0                          |

**Table S4.** 16 commensal *P. aeruginosa* isolates were used in virulence tests.

| No. | Commensal <i>P. aeruginosa</i> Isolates |
|-----|-----------------------------------------|
| 1   | 113.1                                   |
| 2   | 185.1                                   |
| 3   | 211.3                                   |
| 4   | 234.1                                   |
| 5   | 263.1                                   |
| 6   | 267.1                                   |
| 7   | 306.3                                   |
| 8   | 307.1                                   |
| 9   | 307.2                                   |
| 10  | 338.2                                   |
| 11  | 355.1                                   |
| 12  | 388.1                                   |
| 13  | 464.3                                   |
| 14  | 486.1                                   |

|    |       |
|----|-------|
| 15 | 499.2 |
| 16 | 507.1 |

**Table S5.** Biofilm formation, pyocyanin, and siderophores in commensal *P. aeruginosa* isolates after inoculation at 37°C for 24 hours. The values were expressed as mean ± standard deviation.

| Samples                                              | Biofilm (OD 550nm) | Pyocyanin (µg/mL) | Siderophores (mm) |
|------------------------------------------------------|--------------------|-------------------|-------------------|
| 113.1                                                | 0.05 ± 0.00        | 0.10 ± 0.04       | 1.00 ± 0.00       |
| 185.1                                                | 0.01 ± 0.01        | 0.73 ± 0.21       | 1.08 ± 0.14       |
| 211.3                                                | 0.13 ± 0.05        | 0.14 ± 0.10       | 1.08 ± 0.14       |
| 234.1                                                | 0.02 ± 0.00        | 0.05 ± 0.03       | 0.75 ± 0.25       |
| 263.1                                                | 0.09 ± 0.03        | 0.17 ± 0.03       | 1.08 ± 0.38       |
| 267.1                                                | 0.02 ± 0.01        | 1.22 ± 0.12       | 1.25 ± 0.25       |
| 306.3                                                | 0.16 ± 0.04        | 0.47 ± 0.23       | 1.25 ± 0.00       |
| 307.1                                                | 0.11 ± 0.05        | 0.50 ± 0.11       | 1.33 ± 0.14       |
| 307.2                                                | 0.10 ± 0.02        | 0.84 ± 0.15       | 1.41 ± 0.38       |
| 338.2                                                | 0.12 ± 0.07        | 0.71 ± 0.13       | 1.58 ± 0.14       |
| 355.1                                                | 0.15 ± 0.03        | 0.69 ± 0.13       | 1.83 ± 0.14       |
| 388.1                                                | 0.12 ± 0.06        | 0.22 ± 0.14       | 1.25 ± 0.25       |
| 464.3                                                | 0.21 ± 0.02        | 1.19 ± 0.17       | 2.17 ± 0.29       |
| 486.1                                                | 0.21 ± 0.06        | 1.28 ± 0.34       | 1.17 ± 0.14       |
| 499.2                                                | 0.14 ± 0.05        | 0.78 ± 0.33       | 1.17 ± 0.14       |
| 507.1                                                | 0.17 ± 0.01        | 0.70 ± 0.15       | 1.50 ± 0.25       |
| <i>P. aeruginosa</i> ATCC 9027<br>(positive control) | 0.72 ± 0.10        | 0.60 ± 0.23       | 1.33 ± 0.29       |

**Table S6.** Lipase, protease, and gelatinase values in commensal *P. aeruginosa* isolates after incubation at 37°C for 24 hours.

| Samples                                              | Lipase (mm) | Protease (mm) | Gelatinase (mm) |
|------------------------------------------------------|-------------|---------------|-----------------|
| 113.1                                                | 0.12        | 0.30          | 0.32            |
| 185.1                                                | 0.17        | 0.18          | 0.22            |
| 211.3                                                | 0.10        | 0.33          | 0.38            |
| 234.1                                                | 0.13        | 0.00          | 0.00            |
| 263.1                                                | 0.13        | 0.22          | 0.23            |
| 267.1                                                | 0.12        | 0.18          | 0.25            |
| 306.3                                                | 0.17        | 0.17          | 0.22            |
| 307.1                                                | 0.17        | 0.20          | 0.32            |
| 307.2                                                | 0.17        | 0.33          | 0.32            |
| 338.2                                                | 0.12        | 0.28          | 0.32            |
| 355.1                                                | 0.13        | 0.35          | 0.35            |
| 388.1                                                | 0.17        | 0.37          | 0.28            |
| 464.3                                                | 0.23        | 0.43          | 0.30            |
| 486.1                                                | 0.08        | 0.27          | 0.27            |
| 499.2                                                | 0.20        | 0.22          | 0.22            |
| 507.1                                                | 0.17        | 0.38          | 0.30            |
| <i>P. aeruginosa</i> ATCC 9027<br>(positive control) | 0.17        | 0.17          | 0.22            |

**Table S7.** The production of tested virulence factors in commensal *P. aeruginosa* isolates from participants with and without sinusitis history. Average  $\pm$  standard deviation.

| Virulence Factors              | With Sinusitis History | Without Sinusitis History | <i>p</i> -value (ANOVA) |
|--------------------------------|------------------------|---------------------------|-------------------------|
| Biofilm (OD <sub>550nm</sub> ) | 0.13 $\pm$ 0.06        | 0.20 $\pm$ 0.3            | 0.39                    |
| Pyocyanin (ug/ml)              | 0.57 $\pm$ 0.41        | 0.71 $\pm$ 0.36           | 0.52                    |
| Siderophores (mm)              | 1.35 $\pm$ 0.39        | 1.22 $\pm$ 0.09           | 0.48                    |
| Lipase (mm)                    | 0.14 $\pm$ 0.04        | 0.17 $\pm$ 0.03           | 0.27                    |
| Gelatinase (mm)                | 0.28 $\pm$ 0.1         | 0.24 $\pm$ 0.03           | 0.40                    |
| Protease (mm)                  | 0.27 $\pm$ 0.11        | 0.22 $\pm$ 0.08           | 0.41                    |
